# Supplementary material for: MAES_GR: A Web-Based, Spatially Enabled Field Survey Platform for the MAES Implementation in Greece
Source: MDPI journal article supplement (doi:10.3390/land10040381), 2021-04-06
Supplement: s1 [file s1]

## Tool Statistics

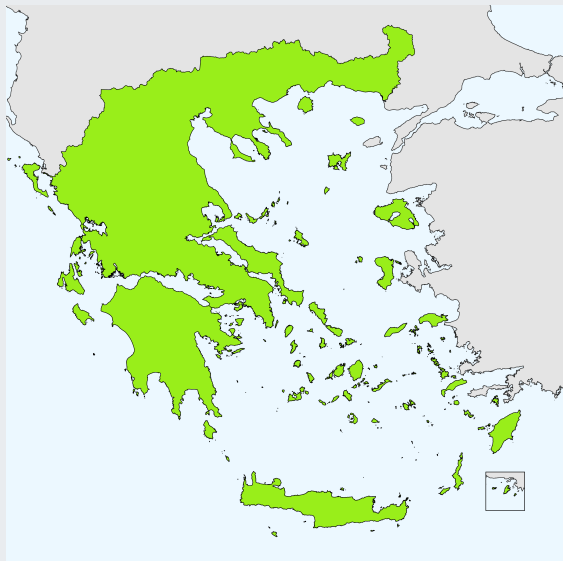

National Level

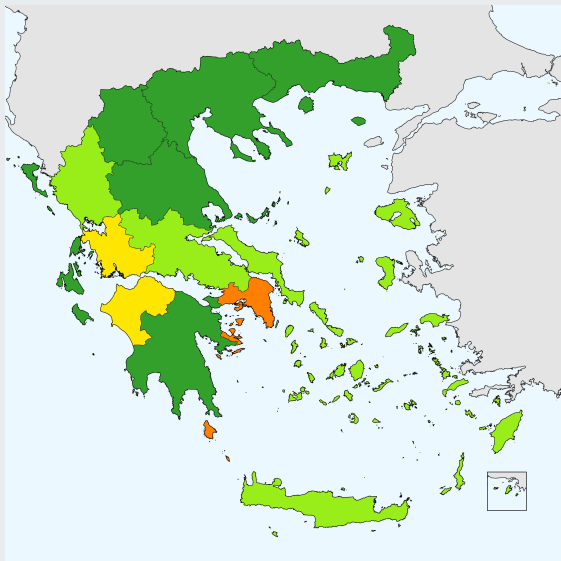

Regional Level

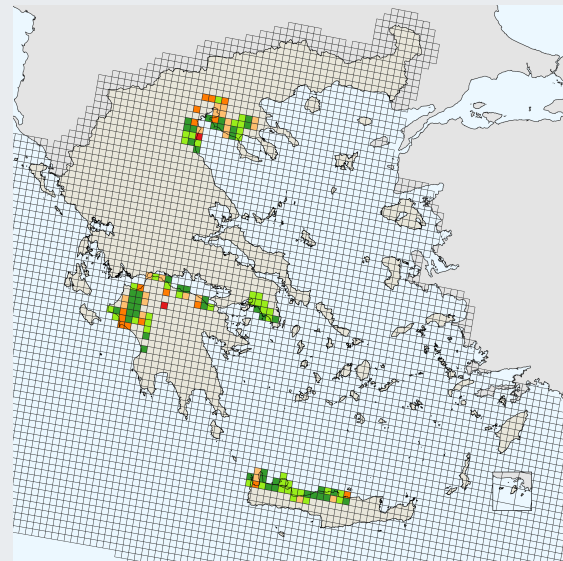

10 km EEA Reference Grid Level

## MAES protocols

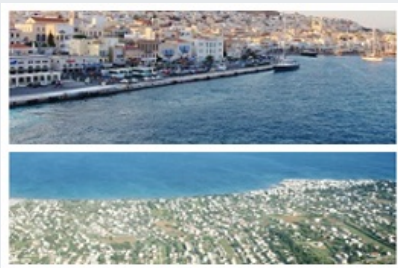

Urban

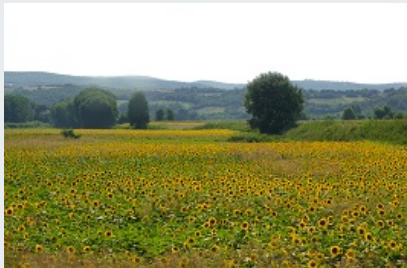

Cropland

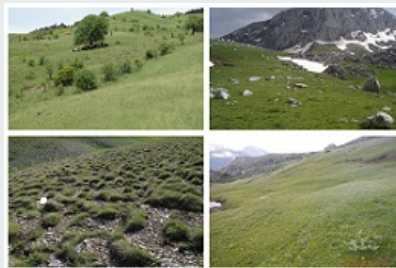

Grassland

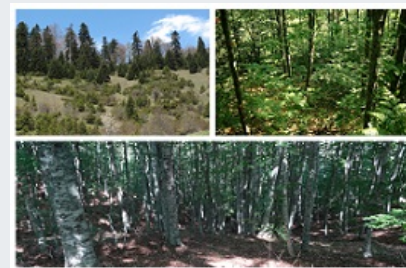

Woodland and forest

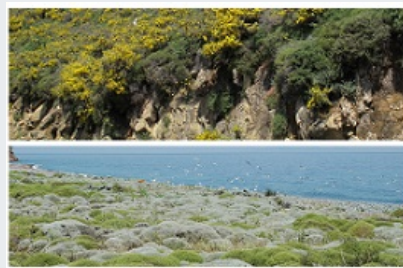

Heathland and shrub

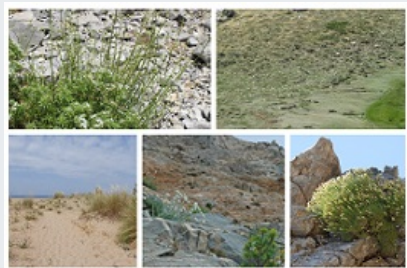

Sparsely vegetated land

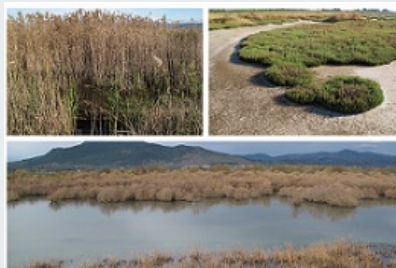

Wetlands

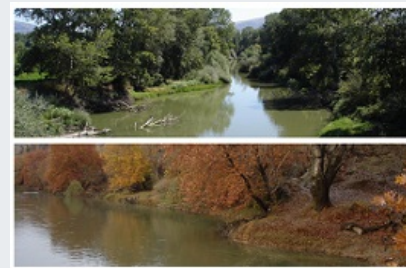

Rivers and lakes

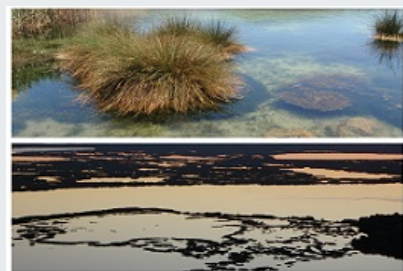

Marine inlets and  
transitional waters

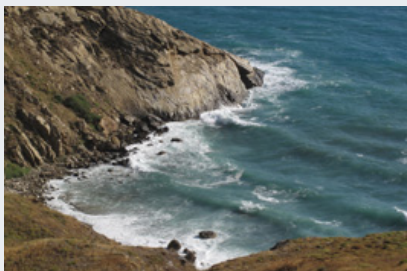

Coastal

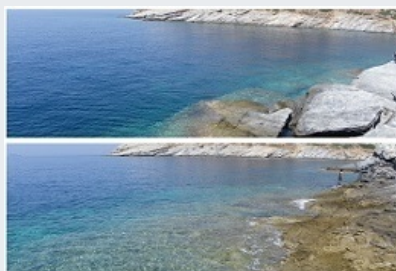

Shelf

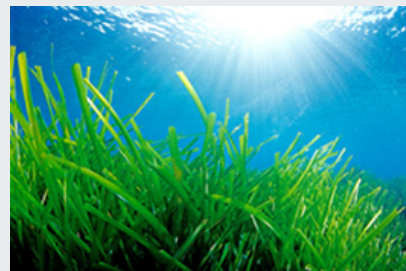

Open ocean

# W

Woodland and forest

## General data

Researcher's name: \*

Researcher 1

Date: \*

08/04/2020

Longitude: \*

22.54835

Latitude: \*

37.977092

Country: \*

Greece

Region: \*

Peloponnese

EEA Grid No: \*

10kmE542N174

Aspect: \*

Northwest

▼

Altitude: \*

1410

## MAES level 3

Temperate deciduous forests

-- Habitat type --

▼

Mediterranean deciduous forests

-- Habitat type --

▼

Floodplain forests (Riparian forest/Fluvial forest)

-- Habitat type --

▼

Temperate mountainous coniferous forests

9530 - (Sub-) Mediter

▼

Mediterranean coniferous forests

-- Habitat type --

▼

Mediterranean sclerophyllous forests

-- Habitat type --

▼

Mixed Forest

-- Habitat type --

▼

## Ecosystem condition

### Structures and functions

| Structures and Functions *                                                     | S           | F           | Add row                             |
|--------------------------------------------------------------------------------|-------------|-------------|-------------------------------------|
| <div>No signs of regressive or progressive succession</div> <div>▼</div>       | <div></div> | <div></div> |                                     |
| <div>Tree canopy not fragmented</div> <div>▼</div>                             | <div></div> | <div></div> |                                     |
| <div>Existence of cryptogam layer with cover higher than 5%</div> <div>▼</div> | <div></div> | <div></div> |                                     |
| <div>Stand stratified (tree, shrub, herb layers present)</div> <div>▼</div>    | <div></div> | <div></div> | <div><div>+</div><div>-</div></div> |

| Structures Number | Functions Number | Structures and Functions Number |
|-------------------|------------------|---------------------------------|
| 3                 | 1                | 4                               |
| <div>Sum</div>    |                  |                                 |

### Pressures and threats

| Pressures and Threats * | Pressures | Threats | Add row |
|-------------------------|-----------|---------|---------|
|                         |           |         |         |

|                                                                       | L                                | M                                | H                     | L                                | M                                | H                     |
|-----------------------------------------------------------------------|----------------------------------|----------------------------------|-----------------------|----------------------------------|----------------------------------|-----------------------|
| A01 - Conversion into agricultural land (excluding drainage and bui   | <input type="radio"/>            | <input checked="" type="radio"/> | <input type="radio"/> | <input type="radio"/>            | <input checked="" type="radio"/> | <input type="radio"/> |
| A26 - Agricultural activities generating diffuse pollution to surface | <input checked="" type="radio"/> | <input type="radio"/>            | <input type="radio"/> | <input checked="" type="radio"/> | <input type="radio"/>            | <input type="radio"/> |
| B09 - Clear-cutting, removal of all trees                             | <input checked="" type="radio"/> | <input type="radio"/>            | <input type="radio"/> | <input type="radio"/>            | <input checked="" type="radio"/> | <input type="radio"/> |

| Pressures Number |   |   |   | Threats Number |   |   |   | oo               |
|------------------|---|---|---|----------------|---|---|---|------------------|
| Total pressures  | L | M | H | Total threats  | L | M | H | P/T Total number |
| 3                | 2 | 1 | 0 | 3              | 1 | 2 | 0 | 6                |
| Sum              |   |   |   |                |   |   |   |                  |

Ecosystem condition <sup>\*</sup> Moderate 

| Ecosystem Services major categories (CICES Sections) | Ecosystem Services (CICES class)           | Actual supply | Potential supply | Comments | Add row |
|------------------------------------------------------|--------------------------------------------|---------------|------------------|----------|---------|
| Provisioning Biotic                                  | Seeds, spores and other plant materials c  | 2             | 4                |          |         |
| Provisioning Biotic                                  | Fibres and other materials from wild plant | 2             | 5                |          | +<br>-  |
| Provisioning Abiotic                                 | -- options --                              |               |                  |          | +<br>-  |
| Regulating and Maintenance (Biotic)                  | Wind protection                            | 4             | 5                |          |         |
| Regulating and Maintenance (Biotic)                  | Visual screening                           | 4             | 5                |          | +<br>-  |
| Regulating and Maintenance (Abiotic)                 | Mass flows                                 | 3             | 5                |          |         |

|                                      |                                                         |              |              |             |                           |
|--------------------------------------|---------------------------------------------------------|--------------|--------------|-------------|---------------------------|
| Regulating and Maintenance (Abiotic) | <div>Liquid flows</div>                                 | <div>4</div> | <div>5</div> | <div></div> | <div>+</div> <div>-</div> |
| Cultural (Biotic)                    | <div>Characteristics of living systems that enal</div>  | <div>3</div> | <div>5</div> | <div></div> |                           |
| Cultural (Biotic)                    | <div>Characteristics of living systems that are i</div> | <div>2</div> | <div>5</div> | <div></div> | <div>+</div> <div>-</div> |
| Cultural (Abiotic)                   | <div>-- options --</div>                                | <div></div>  | <div></div>  | <div></div> | <div>+</div> <div>-</div> |

| Number of CICES class per CICES Sections |                      |                                     |                                      |                   |                    |     |
|------------------------------------------|----------------------|-------------------------------------|--------------------------------------|-------------------|--------------------|-----|
| Provisioning Biotic                      | Provisioning Abiotic | Regulating and Maintenance (Biotic) | Regulating and Maintenance (Abiotic) | Cultural (Biotic) | Cultural (Abiotic) | Sum |
| 2                                        | 0                    | 2                                   | 2                                    | 2                 | 0                  | 8   |
| Sum                                      |                      |                                     |                                      |                   |                    |     |

Update

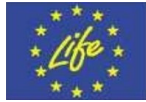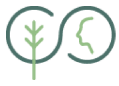

Εδώ ζούμε  
Natura 2000

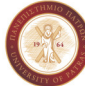

UNIVERSITY OF  
PATRAS  
ΠΑΝΕΠΙΣΤΗΜΙΟ ΠΑΤΡΩΝ

You have successfully submitted the protocol with id: 873

Expert evaluated the ecosystem's condition as: **moderate**

The algorithm evaluated the ecosystem's condition as: **0.148 (Moderate)**
